# Supplementary material for: Myelin Disruption, Neuroinflammation, and Oxidative Stress Induced by Sulfite in the Striatum of Rats Are Mitigated by the pan-PPAR agonist Bezafibrate
Source: MDPI journal article supplement (doi:10.3390/cells12121557), 2023-06-06
Supplement: s1 [file s1]

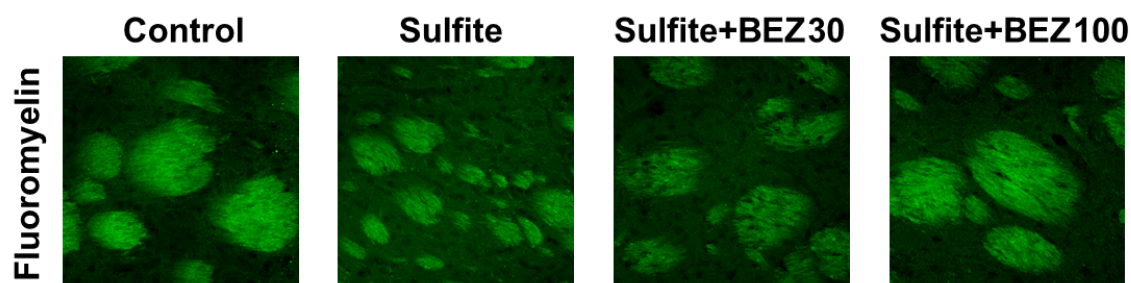

**Supplementary Figure S1.** Bezafibrate (BEZ) post-treatment mitigates sulfite-induced reduction in Fluoromyelin staining in rat striatum 7 days after sulfite injection (2  $\mu$ mol). Animals were post-treated with BEZ (30 or 100 mg/kg/day) for 7 days after sulfite infusion. Representative images are shown.

**Supplementary Table S1.** Genes analyzed by quantitative RT-PCR.

| Gene                                                   | Assay ID       |
|--------------------------------------------------------|----------------|
| Interleukin-6 (IL-6)                                   | #Rn01410330 m1 |
| Interleukin-1 $\beta$ (IL-1 $\beta$ )                  | #Rn00580432 m1 |
| Interleukin-10 (IL-10)                                 | #Rn00563409 m1 |
| Tumor necrosis factor- $\alpha$ (TNF- $\alpha$ )       | #Rn99999017 m1 |
| IL1 receptor type I (IL1R1)                            | #Rn00565482 m1 |
| TNF receptor 1 (TNFR1)                                 | #Rn01492348 m1 |
| Nuclear factor kappa B p65 subunit (NF $\kappa$ B p65) | #Rn01502266 m1 |
| Cyclooxygenase-2 (COX-2)                               | #Rn01483828 m1 |
| Inducible nitric oxide synthase (iNOS)                 | #Rn00561646 m1 |
| Nuclear factor erythroid 2-related factor 2 (Nrf2)     | #Rn00582415 m1 |
| Heme oxygenase-1 (HO-1)                                | #Rn01536933 m1 |
| Superoxide dismutase 1 (SOD1)                          | #Rn00566938 m1 |
| Superoxide dismutase 2 (SOD2)                          | #Rn00690588 g1 |
| $\beta$ -actin                                         | #Rn00667869 m1 |
